# Supplementary figures and images for: Type 1-programmed dendritic cells drive antigen-specific latency reversal and immune elimination of persistent HIV-1
Source: PubMed Central journal article supplement — eBioMedicine. 2019 Apr 2;43:295–306. doi: 10.1016/j.ebiom.2019.03.077 (PMC6557749; doi:10.1016/j.ebiom.2019.03.077), 2019-04-02

Supplemental Figure 1

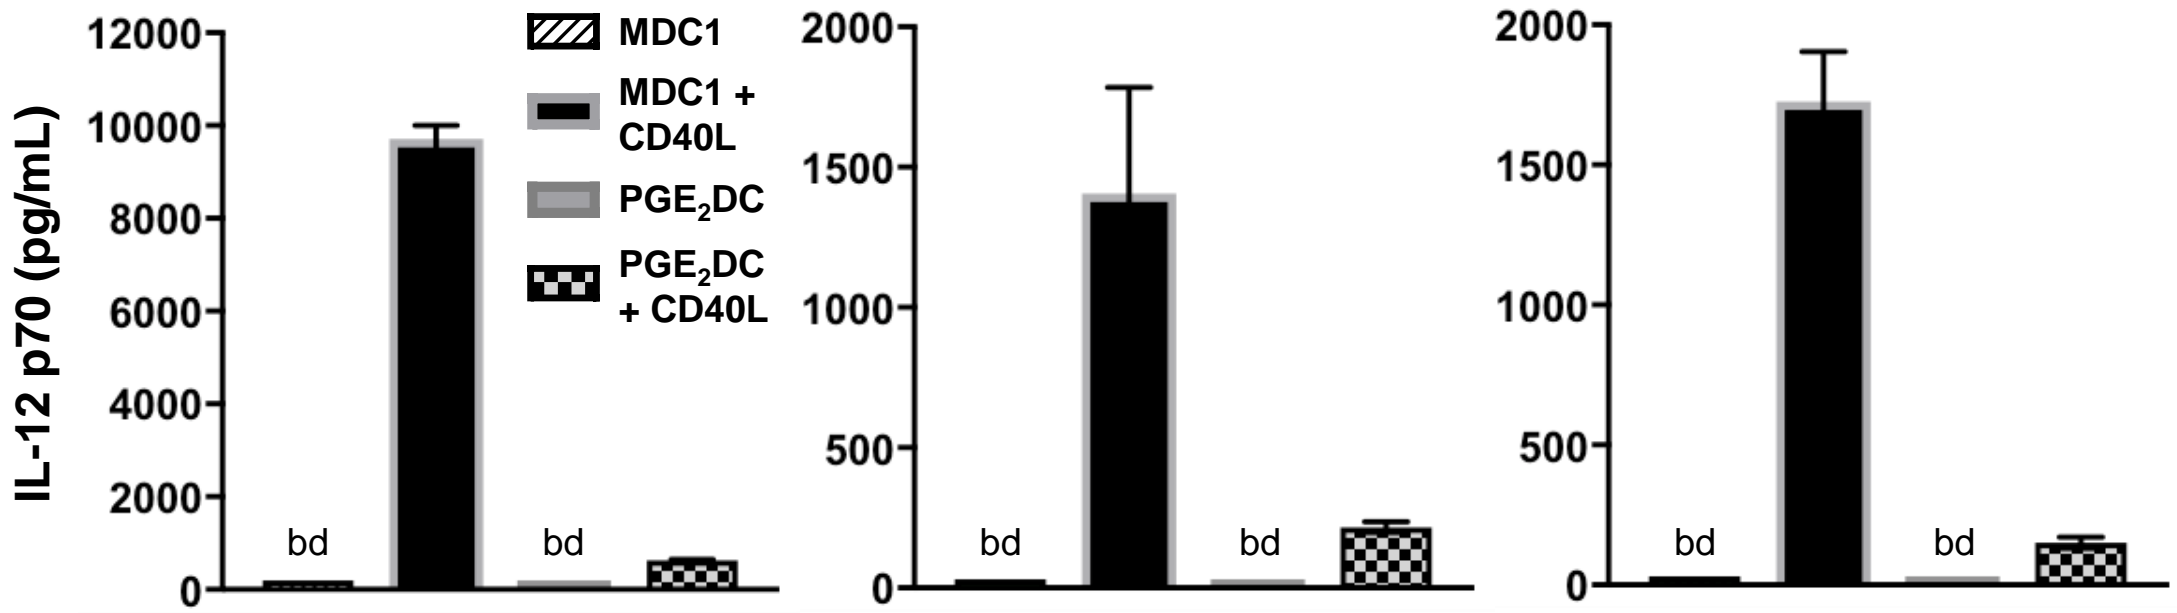

# Supplemental Figure 2

Effector : Target

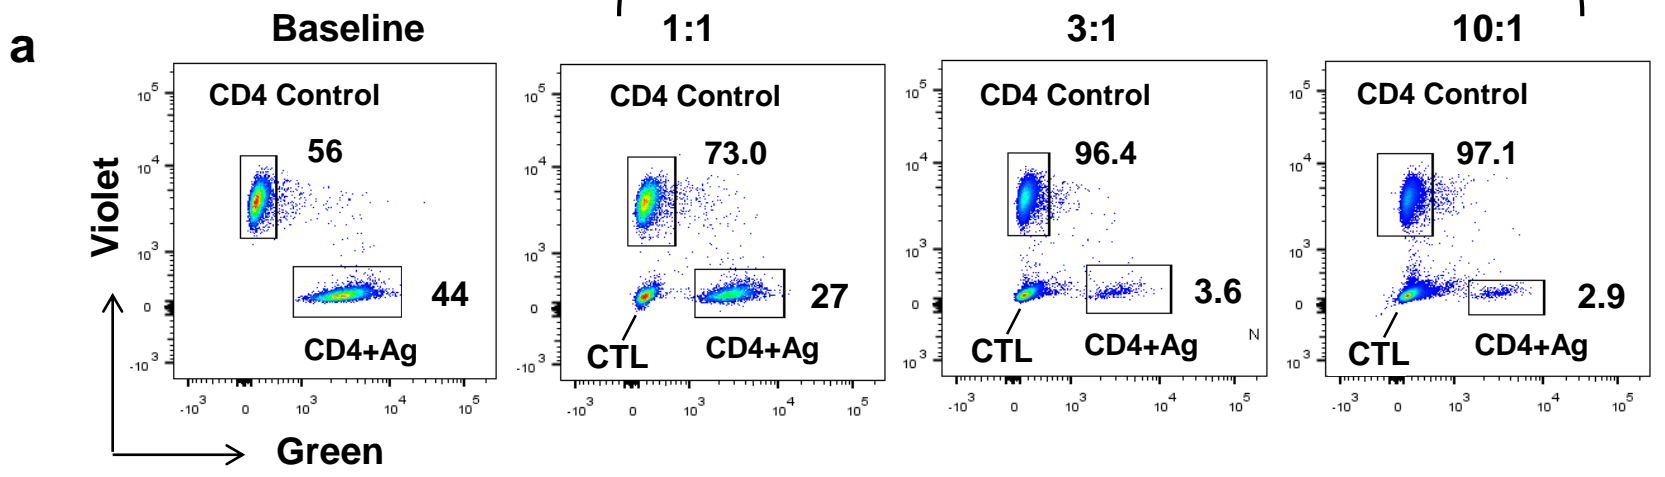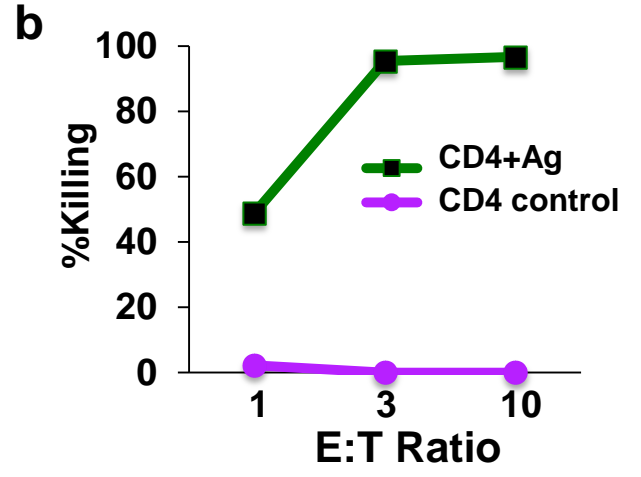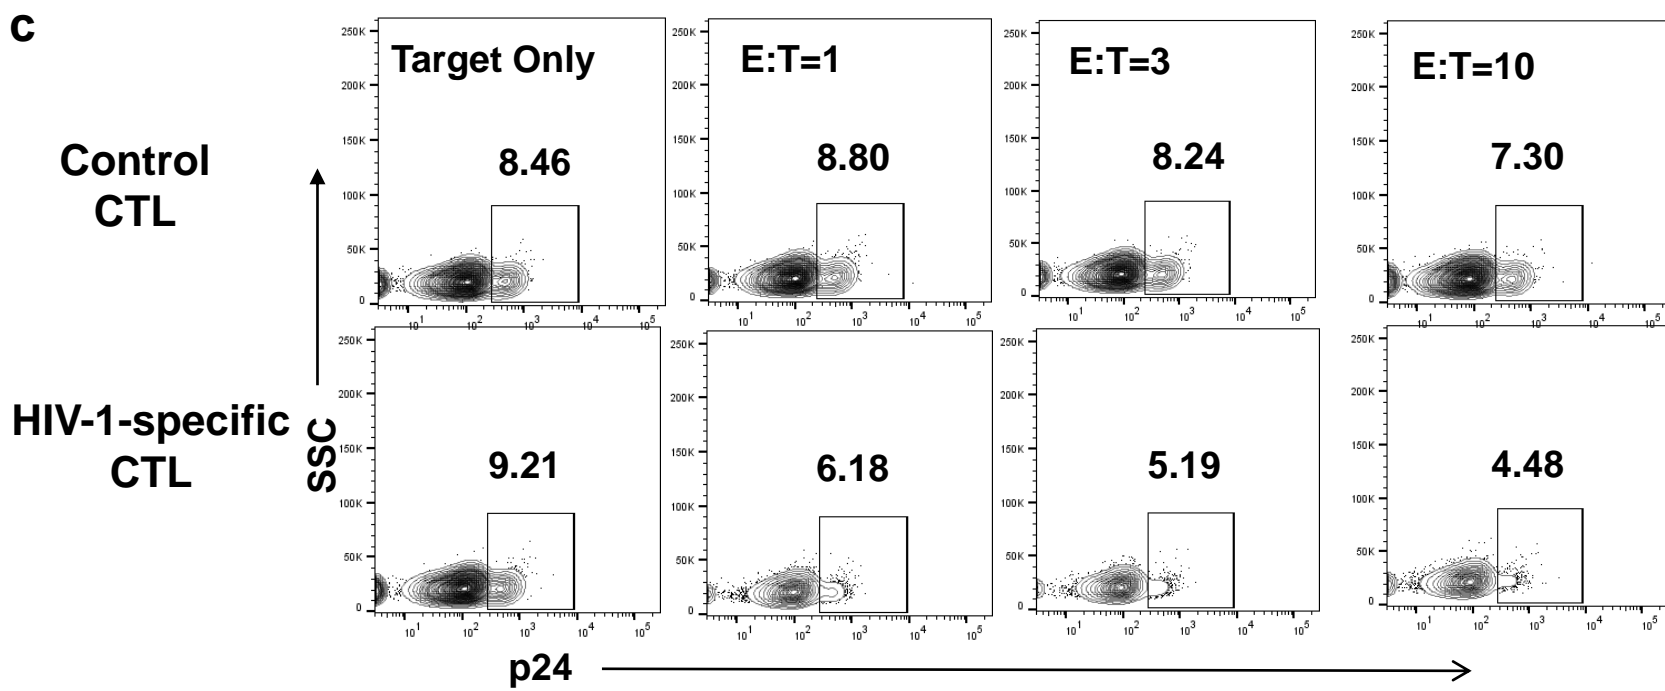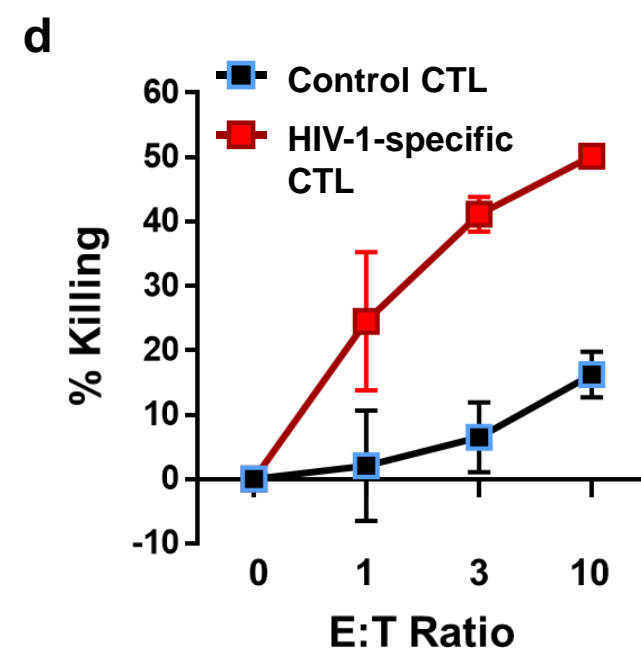

Supplement: mmc1.pdf [file mmc1.pdf]
